# Supplementary figures and images for: Multiple-polarization-sensitive photodetector Based on a plasmonic metasurface
Source: Royal Society of Chemistry journal article supplement (doi:10.1039/d4nr00808a), 2024-01-01

(a)

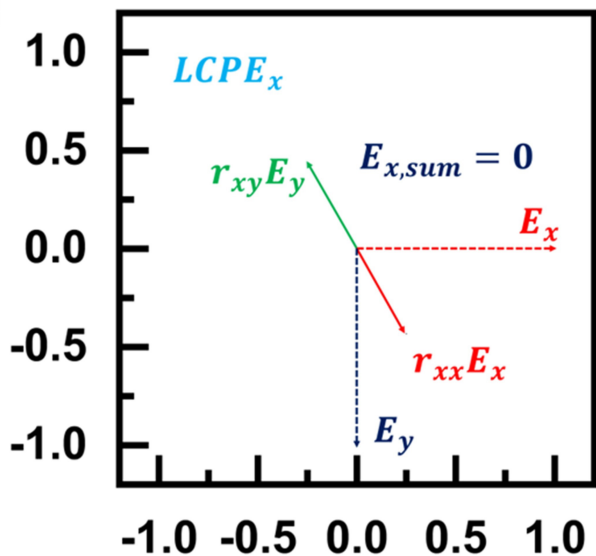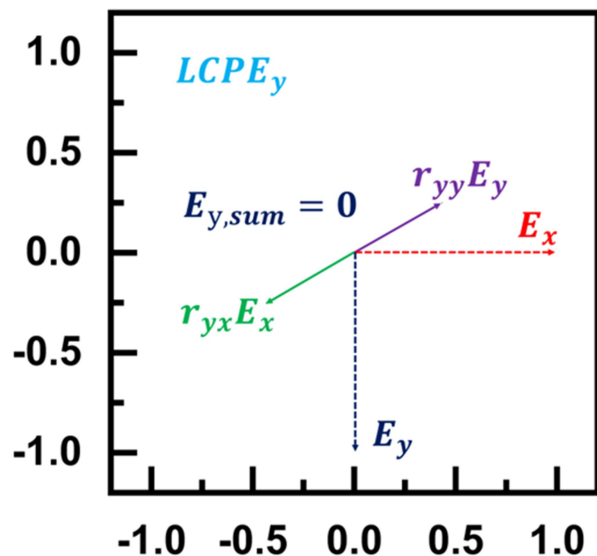

(b)

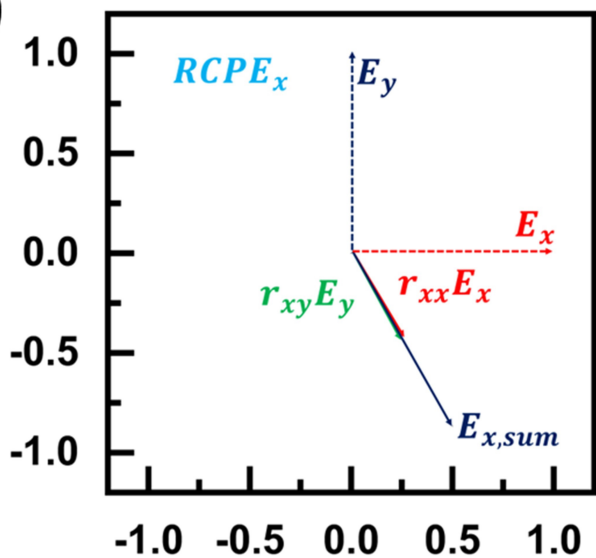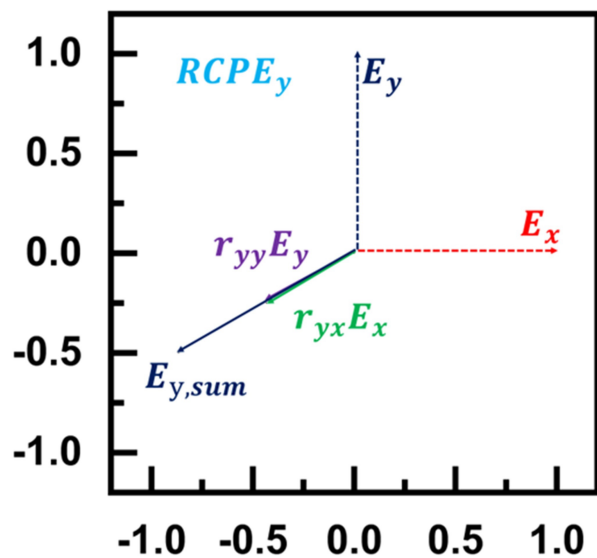

Supplement: d4nr00808a2.pdf [file d4nr00808a2.pdf]

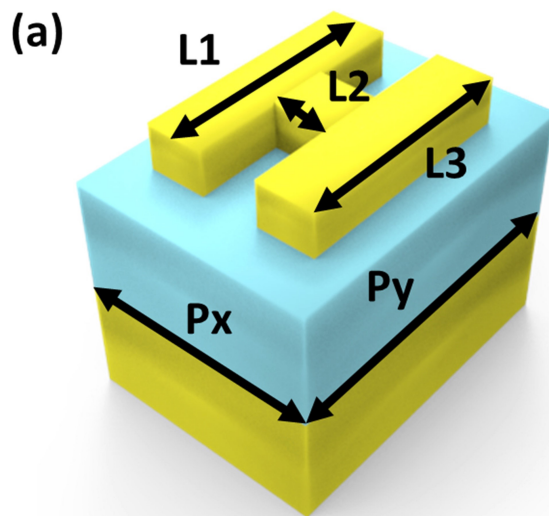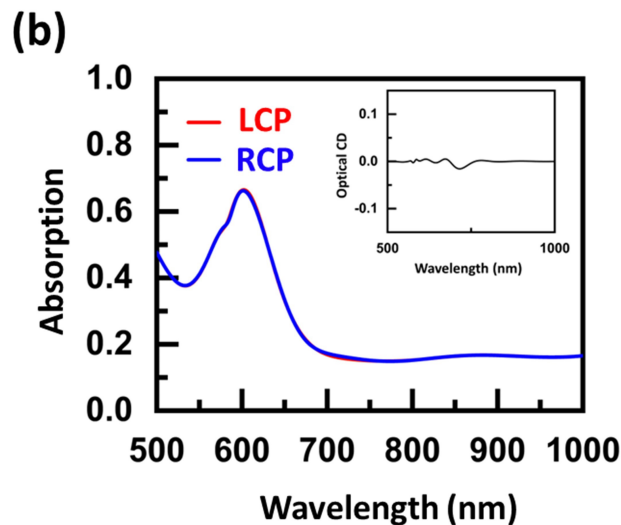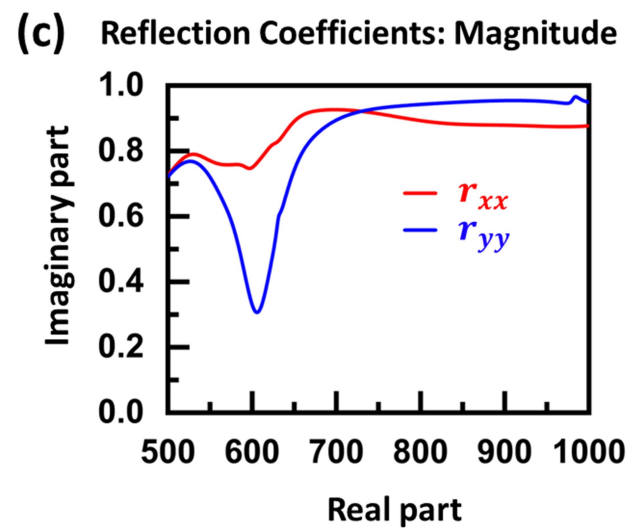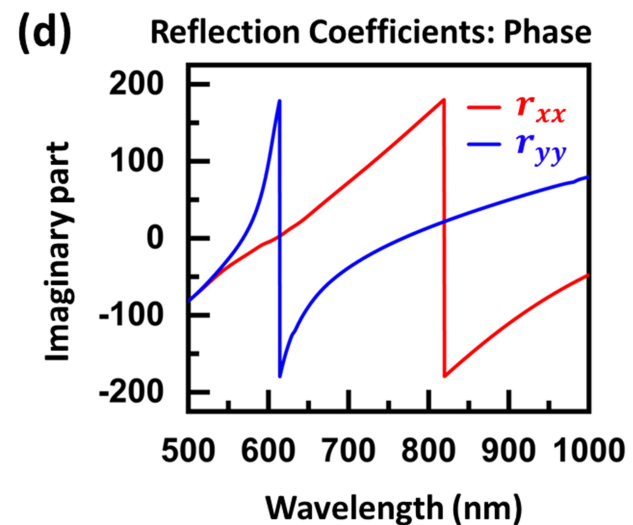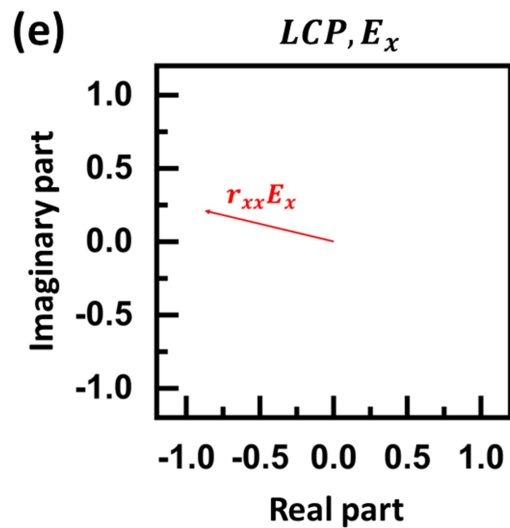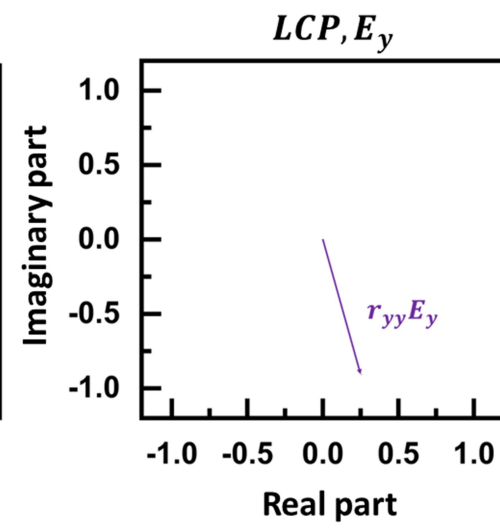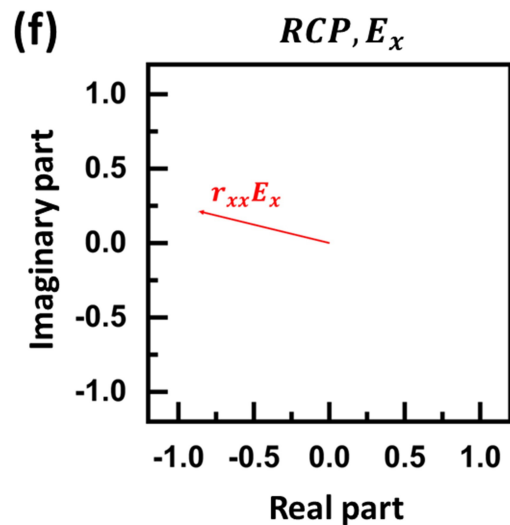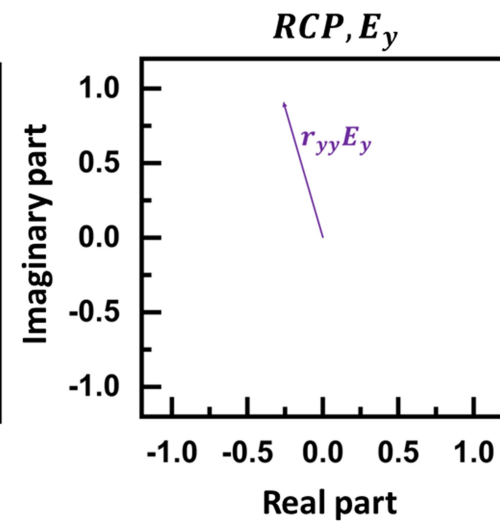

Supplement: d4nr00808a3.pdf [file d4nr00808a3.pdf]

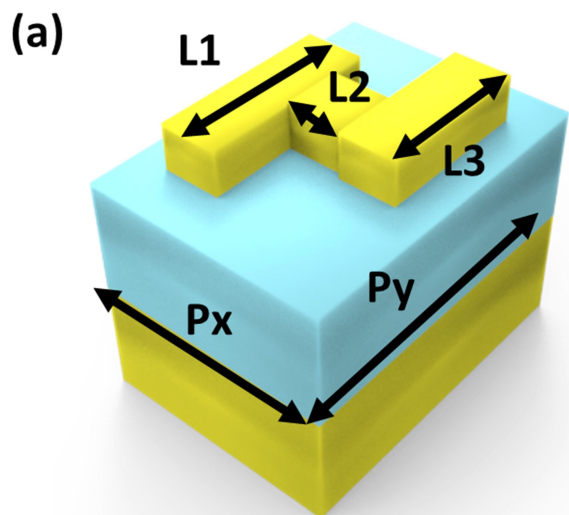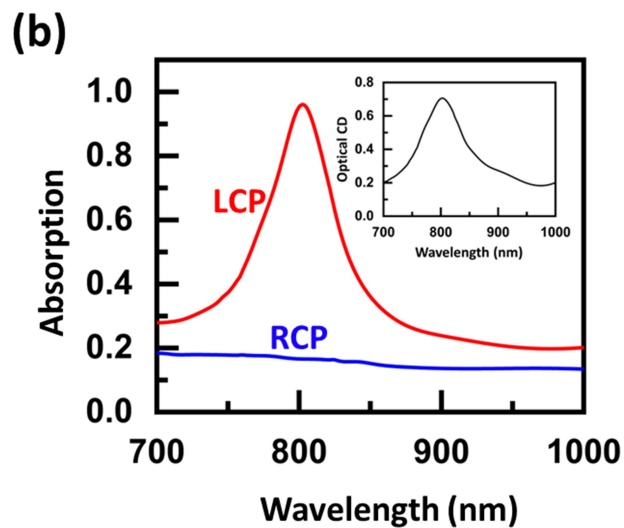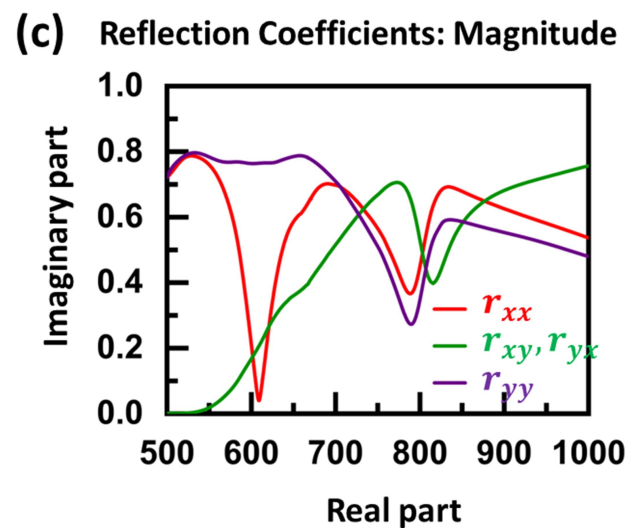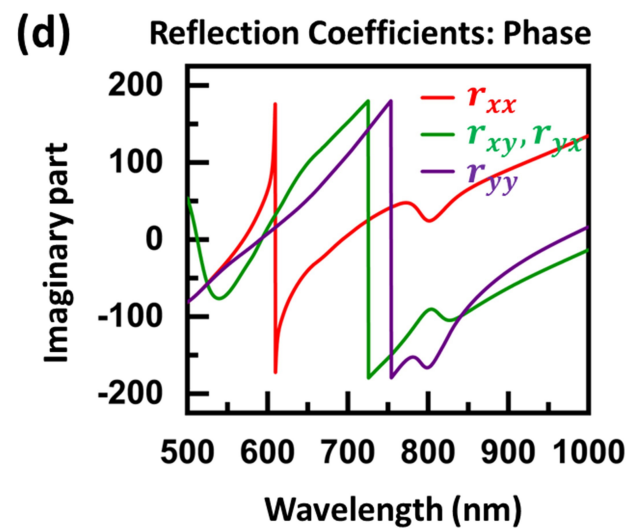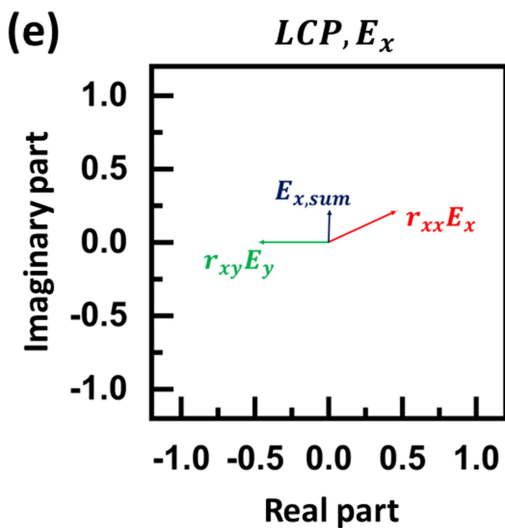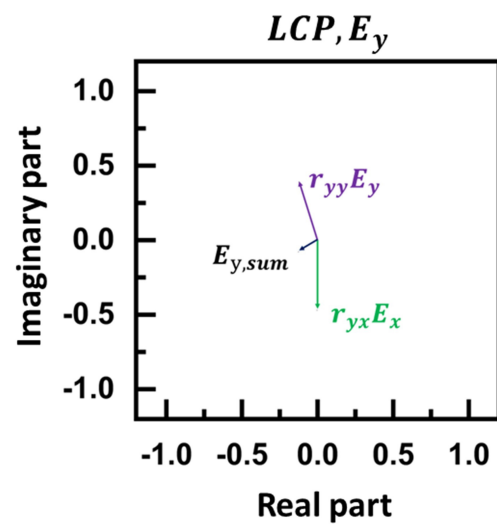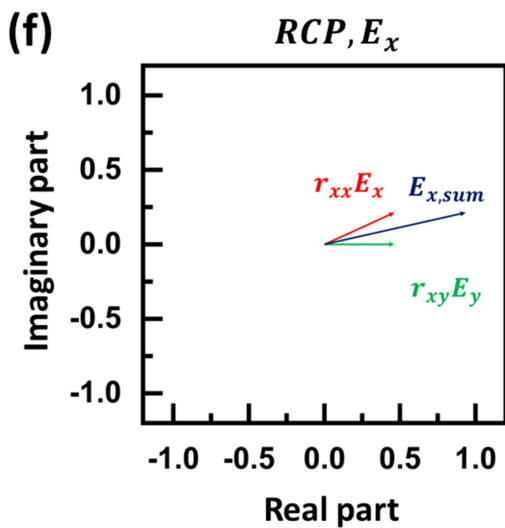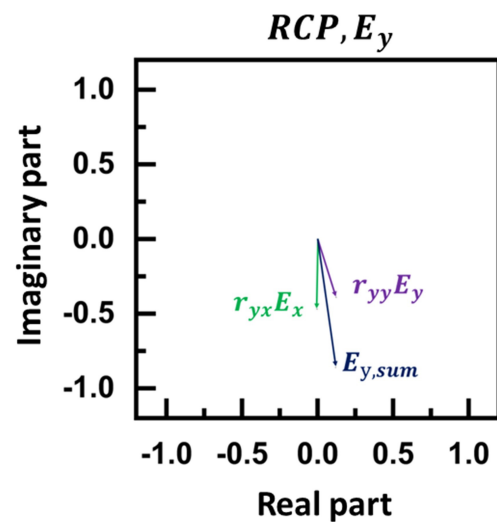

Supplement: d4nr00808a4.pdf [file d4nr00808a4.pdf]
